# Supplementary material for: TGFβ restores hematopoietic homeostasis after myelosuppressive chemotherapy
Source: PubMed Central journal article supplement — J Exp Med. 2013 Mar 11;210(3):623–39. doi: 10.1084/jem.20121610 (PMC3600905; doi:10.1084/jem.20121610), 2013-03-11
Supplement: supp_jem.20121610_JEM_20121610_sm.pdf [file supp_jem.20121610_JEM_20121610_sm.pdf]

## SUPPLEMENTAL MATERIAL

Brenet et al., <http://www.jem.org/cgi/content/full/jem.20121610/DC1>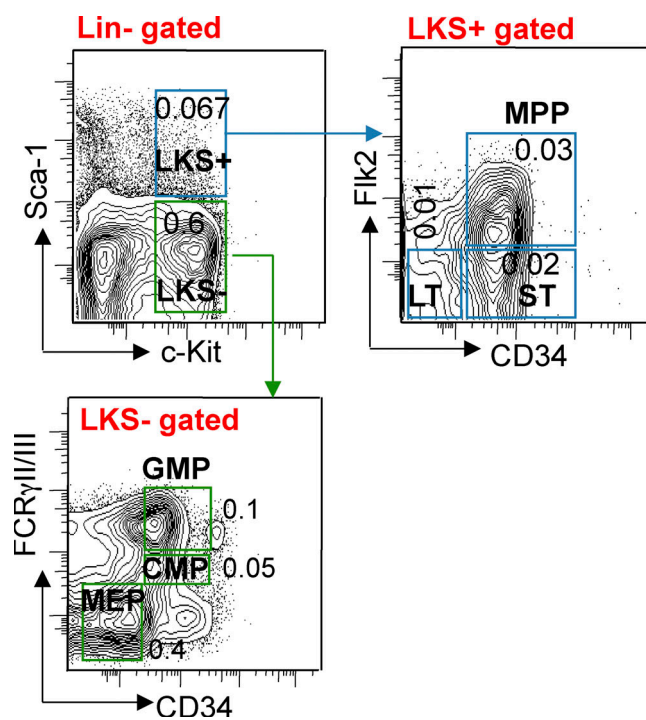

**Figure S1. Flow cytometry gating strategy.** Representative plots of the LKS<sup>+</sup> and LKS<sup>-</sup> populations are shown. Back numbers indicate frequency of total BM in untreated, homeostatic mice (D0). LKS<sup>+</sup> (Lin<sup>-</sup>cKit<sup>+</sup>Sca1<sup>+</sup>), LT (LKS<sup>+</sup>Flk2<sup>-</sup>CD34<sup>-</sup>), ST (LKS<sup>+</sup>Flk2<sup>-</sup>CD34<sup>+</sup>), MPPs (LKS<sup>+</sup>Flk2<sup>+</sup>CD34<sup>+</sup>), LKS<sup>-</sup> (Lin<sup>-</sup>cKit<sup>+</sup>Sca1<sup>-</sup>), CMPs (LKS<sup>-</sup>FcRγII/III<sup>+</sup>CD34<sup>+</sup>), GMPs (LKS<sup>-</sup>FcRγII/III<sup>+</sup>CD34<sup>+</sup>), and MEPs (LKS<sup>-</sup>FcRγII/III<sup>-</sup>CD34<sup>-</sup>) are shown.
